# Supplementary material for: One microRNA has the potential to target whole viral mRNAs in a given human coronavirus
Source: Front Microbiol. 2022 Nov 10;13:1035044. doi: 10.3389/fmicb.2022.1035044 (PMC9686371; doi:10.3389/fmicb.2022.1035044)
Supplement: Supplementary file 2 [file Data_Sheet_1.XLSX]

## Sheet: Sheet1
Type of target	Effect on the target mRNA	Name of miRNA	Name of target mRNA	Name of Viruses	Effect on the virus	Verification methods	Title of the referred paper	Referrences (The first author & corresponding author, published Year)	The first affilitation
Host mRNA
3'UTR	up-regulating the translation of target mRNA	miR-136	IL-6	H5N1, VSV	inhibitory	cell experiment	Identification of cellular microRNA-136 as a dual regulator of RIG-I-mediated innate immunity that antagonizes H5N1 IAV replication in A549 cells	Lianzhong Zhao & Hongbo Zhou, Meilin Jin, 2015	State Key Laboratory of Agriculture Microbiology, Huazhong Agricultural University, Wuhan 430070, Hubei Province, P . R. China.
	Down-regulating the translation of target mRNA	miR-194	FGF2	H1N1	promoting	animal and cell experiments	miR-194 Inhibits Innate Antiviral Immunity by Targeting FGF2 in Influenza H1N1 Virus Infection	Keyu Wang & Penghui Yang, Xiliang Wang, 2017	State Key Laboratory of Pathogen and Biosecurity, Beijing Institute of Microbiology and Epidemiology, Beijing, China,
		miR-21-3p	FGF2	H5N1	promoting	cell experiment	MicroRNA-21-3p modulates FGF2 to facilitate influenza A virus H5N1 replication by refraining type I interferon response	Jianli Shi & Tingting Gu, 2020	Department of Paediatrics, The Fourth People’s Hospital of Jinan, Jinan 250031, Shandong, China
		H5N1-miRNA-HA-3p	PCBP2	H5N1	increases cytokine production and mouse mortality	animal and cell experiments	H5N1 influenza virus-specific miRNA-like small RNA increases cytokine production and mouse mortality via targeting poly(rC)-binding protein 2.	Xihan Li & Jin Wang, Ke Zen, Chen-Y Zhang, 2018	State Key Laboratory of Pharmaceutical Biotechnology, Jiangsu Engineering Research Center for MicroRNA Biology and Biotechnology, Nanjing Advanced Institute for Life Sciences (NAILS), School of Life Sciences, Nanjing University, Nanjing, Jiangsu 210046, China
		hsa-miR-1-3p	ATP6V1a	H3N2, H1N1	inhibitory	animal and cell experiments	Endogenous Cellular MicroRNAs Mediate Antiviral Defense against Influenza A Virus.	Shanxin Peng & Min Fang, Songdong Meng, 2018	CAS Key Laboratory of Pathogenic Microbiology and Immunology, Institute of Microbiology, Chinese Academy of Sciences (CAS), Beijing, China;
		miR-340	RIG-I, OAS2	IAV	promoting	cell experiment	The Downregulation of MicroRNA hsa-miR-340-5p in IAV-Infected A549 Cells Suppresses Viral Replication by Targeting RIG-I and OAS2	Lianzhong Zhao & Meilin Jin, 2019	State Key Laboratory of Agricultural Microbiology, Huazhong Agricultural University, Wuhan 430070, Hubei Province, China;
		miR-21-3p	HDAC8	IAV	promoting	cell experiment	miR-21-3p Regulates Influenza A Virus Replication by Targeting Histone Deacetylase-8	Binghui Xia & Xiaowei Zhou, Peitang Huang, 2018	Laboratory of Protein Engineering, Beijing Institute of Biotechnology, Beijing, China
		miR-26a	USP3	IAV	inhibitory	cell experiment	Influenza A virus-induced downregulation of miR-26a contributes to reduced IFNalpha/beta production	Shijuan Gao & Wenlin Huang, 2017	The Key Laboratory of Remodeling-Related Cardiovascular Diseases, Collaborative Innovation Center for Cardiovascular Disorders, Beijing Institute of Heart, Lung & Blood Vessel Diseases; Beijing Anzhen Hospital, Capital Medical University, Beijing 100029, China
		miR-449b	HDAC1	IAV	inhibitory	cell experiment	Small RNA profiling of influenza A virus-infected cells identifies miR-449b as a regulator of histone deacetylase 1 and interferon beta	William A. Buggele & Curt M. Horvath, 2013	Department of Molecular Biosciences, Northwestern University, Evanston, Illinois, United States of America
		miR-203	DR1	IAV	inhibitory	cell experiment	Up-regulation of microRNA-203 in influenza A virus infection inhibits viral replication by targeting DR1	Sen Zhang & Yusen Zhou, Yi Hu, 2018	State Key Laboratory of Pathogen and Biosecurity, Beijing Institute of Microbiology and Epidemiology, Beijing, 100071, People’s Republic of China.
		miR-146a	TRAF6	IAV	promoting	animal and cell experiments	Downregulation of miR-146a inhibits influenza A virus replication by enhancing the type I interferon response in vitro and in vivo	Fuming Zhang & Wangsen Qin, 2019	Clinical Laboratory, Henan Provincial People’s Hospital, People’s Hospital of Zhengzhou University, Zhengzhou, Henan, 450003, China
		miR-206	TNKS2	IAV	inhibitory	animal and cell experiments	MicroRNA-206 inhibits influenza A virus replication by targeting tankyrase 2	Gayan Bamunuarachchi & Lin Liu, 2021	Oklahoma Center for Respiratory and Infectious Diseases, Oklahoma State University, Stillwater, Oklahoma, USA
		miR-302c	NIK	IAV	promoting	cell experiment	Mir-302c mediates influenza A virus-induced IFNbeta expression by targeting NF-kappaB inducing kinase	Shulin Gui & Shi Liu , 2015	State Key Laboratory of Virology and College of Life Sciences, Wuhan University, Wuhan 430072, China
		miR-30	SOCS1, SOCS3, NEDD4	IAV	inhibitory	animal and cell experiments	Human microRNA-30 inhibits influenza virus infection by suppressing the expression of SOCS1, SOCS3, and NEDD4	Xian Lin & Meilin Jin, 2020	State Key Laboratory of Agricultural Microbiology, Huazhong Agricultural University, Wuhan, China
		miR-4776	NFKBIB	IAV	inhibitory	cell experiment	Upregulation of miRNA-4776 in Influenza Virus Infected Bronchial Epithelial Cells Is Associated with Downregulation of NFKBIB and Increased Viral Survival	Sreekumar Othumpangat & Sreekumar Othumpangat, 2017	Allergy and Clinical Immunology Branch, Health Effects Laboratory Division, National Institute for Occupational Safety and Health, Centers for Disease Control and Prevention, Morgantown, WV 26505, USA;
		miR-29a	FZD5	IAV	inhibitory	cell experiment	miR-29a is a negative regulator of influenza virus infection through targeting of the frizzled 5 receptor	Xiaoyun Yang & Lin Liu, 2021	Oklahoma Center for Respiratory and Infectious Diseases, Oklahoma State University, Stillwater, Oklahoma, USA
		miR-34a	Bax	IAV	contributes to virus-mediated apoptosis	cell experiment	MicroRNA 34a contributes to virus-mediated apoptosis through binding to its target gene Bax in influenza A virus infection	Niannian Fan & Niannian Fan, 2016	Department of Laboratory Medicine, Huaihe Hospital of Henan University, Kaifeng 475000, Henan, China
		miR-29c	BCL2L2	IAV	contributes to virus-mediated apoptosis	cell experiment	Induction of the cellular microRNA-29c by influenza virus contributes to virus-mediated apoptosis through repression of antiapoptotic factors BCL2L2	Zhenhong Guan & Ming Duan, 2012	Key Laboratory of Zoonosis, Ministry of Education, Institute of Zoonosis, Jilin University, Changchun 130062, PR China
		miR-9	MCPIP1	IAV	promoting	cell experiment	Modulation of influenza A virus replication by microRNA-9 through targeting MCPIP1	Chunyan Dong & Ming Duan, 2016	Key Laboratory of Zoonosis, Ministry of Education, Institute of Zoonosis, Jilin University, Changchun, China
		miR-33a	ARCN1	IAV	inhibitory	cell experiment	MicroRNA-33a disturbs influenza A virus replication by targeting ARCN1 and inhibiting viral ribonucleoprotein activity	Yi Hu & Xin Ye, 2015	Center for Molecular Immunology, CAS Key Laboratory of Pathogenic Microbiology and Immunology, Institute of Microbiology, Chinese Academy of Sciences (CAS), Beijing 100101, PR China
		miR-132	MAPK3	IAV	promoting	cell experiment	Influenza A virus infection of human respiratory cells induces primary microRNA expression	William A. Buggele1 & Curt M. Horvath, 2012	Department of Molecular Biosciences, Northwestern University, Evanston, Illinois 60208
		miR-146	IRAK1	IAV	promoting	cell experiment	Influenza A virus infection of human respiratory cells induces primary microRNA expression	William A. Buggele1 & Curt M. Horvath, 2012	Department of Molecular Biosciences, Northwestern University, Evanston, Illinois 60208
		miR-1275	MAPK3	IAV	promoting	cell experiment	Influenza A virus infection of human respiratory cells induces primary microRNA expression	William A. Buggele1 & Curt M. Horvath, 2012	Department of Molecular Biosciences, Northwestern University, Evanston, Illinois 60208
		miR-193B	β-catenin	IAV	inhibitory	animal and cell experiments	miR‐193b represses influenza A virus infection by inhibiting Wnt/β‐catenin signalling	Xiaoyun Yang & Lin Liu, 2019	Oklahoma Center for Respiratory and Infectious Diseases, Oklahoma State University, Stillwater, Oklahoma, USA
		miR-144	TRAF6	Influenza virus	promoting	animal and cell experiments	miR-144 attenuates the host response to influenza virus by targeting the TRAF6-IRF7 signaling axis	Carrie M. Rosenberger & Alan Aderem, 2017	Center for Infectious Disease Research, Seattle, WA United States of America,
		miR-27b-3p	SOCS6	TGEV	inhibitory	cell experiment	Coronavirus transmissible gastroenteritis virus antagonizes the antiviral effect of the microRNA miR-27b via the IRE1 pathway	Changlin Wang & Keliang Wang, Wanhai Xu, Li Feng, 2021	State Key Laboratory of V eterinary Biotechnology, Harbin V eterinary Research Institute, Chinese Academy of Agricultural Sciences, Harbin 150069, China;
		miR-30a-5p	SOCS1, SOCS3	TGEV	inhibitory	animal and cell experiments	The Coronavirus Transmissible Gastroenteritis Virus Evades the Type I Interferon Response through IRE1alpha-Mediated Manipulation of the MicroRNA miR-30a-5p/SOCS1/3	Yanlong Ma & Li Feng, Pinghuang Liu, 2018	State Key Laboratory of Veterinary Biotechnology, Harbin Veterinary Research Institute, Chinese Academy of Agricultural Sciences, Harbin, China
		miR-885-3p	Bcl-10	TGEV	promoting	cell experiment	Transmissible gastroenteritis virus ORF3b up-regulates miR-885-3p to counteract TNF-alpha production via inhibiting NF-kappaB pathway	Jianxiong Guo & Dewen Tong , 2021	College of Veterinary Medicine, Northwest A & F University, Yangling, Shaanxi 712100, PR China
		miR-27b	RUNX1	TGEV	attenuates apoptosis	cell experiment	miR-27b attenuates apoptosis induced by transmissible gastroenteritis virus (TGEV) infection via targeting runtrelated transcription factor 1 (RUNX1)	Xiaomin Zhao & Dewen Tong, 2016	College of Veterinary Medicine, Northwest A & F University, Yangling, Shaanxi, China
		miR-221-5p	NFKBIA, SOCS1	PEDV	inhibitory	cell experiment	MicroRNA-221-5p Inhibits Porcine Epidemic Diarrhea Virus Replication by Targeting Genomic Viral RNA and Activating the NF-kappaB Pathway	Hongqing Zheng & Yanming Zhang 1, 2018	College of V eterinary Medicine, Northwest A & F University , Yangling 712100, China;
		Synthetic 3'-miva RNAII-138	CUL4A	AD	promoting	cell experiment	A MicroRNA Derived from Adenovirus Virus-Associated RNAII Promotes Virus Infection via Posttranscriptional Gene Silencing	K. Wakabayashi & F. Sakurai, H. Mizuguchi, 2019	Laboratory of Biochemistry and Molecular Biology, Graduate School of Pharmaceutical Sciences, Osaka University, Osaka, Japan
		miR-27a/b	SNAP25, TXN2	AD	inhibitory	cell experiment	MicroRNA miR-27 Inhibits Adenovirus Infection by Suppressing the Expression of SNAP25 and TXN2	Mitsuhiro Machitani & Fuminori, Hiroyuki Mizuguchi, 2017	Laboratory of Biochemistry and Molecular Biology, Graduate School of Pharmaceutical Sciences, Osaka
		let-7	TSC1	RV	inhibitory	cell experiment	synchronized orchestration of miR99b and let-7g Positively Regulates Rotavirus Infection by Modulating Autophagy	Urbi Mukhopadhyay & Anupam Mukherjee , Mamta Chawla-Sarkar,2019	Division of Virology, national institute of cholera and enteric Diseases, Kolkata, WB, india
		miR-29b	TRIM44, CCNE1	RV	inhibitory	cell experiment	Rotavirus Induces Epithelial-Mesenchymal Transition Markers by Transcriptional Suppression of miRNA-29b	Urbi Mukhopadhyay & Anupam Mukherjee, 2021	Division of Molecular Virology, ICMR-National Institute of Cholera and Enteric Diseases, Kolkata, India
		miR-142-5p	TGFβ R2, Smad3	RV	promoting	cell experiment	Rotavirus-induced miR-142-5p elicits proviral milieu by targeting non-canonical transforming growth factor beta signalling and apoptosis in cells	Shampa Chanda & Mamta Chawla-Sarkar, 2016	Division of Virology, National Institute of Cholera and Enteric Diseases, P-33, C.I.T. Road Scheme-XM, Beliaghata, Kolkata, West Bengal, 700010, India.
		miR-30a	Beclin-1	EV71	inhibitory	cell experiment	Enterovirus 71 induces autophagy by regulating has-miR-30a expression to promote viral replication	Yuxuan Fu & Zhiwei Wu, 2015	Center for Public Health Research, Medical School, Nanjing University, Nanjing;
		miR-197	RAN	EV71	inhibitory	cell experiment	Host MicroRNA miR-197 Plays a Negative Regulatory Role in the Enterovirus 71 Infectious Cycle by Targeting the RAN Protein	Wen-Fang Tang & Jim-ong Horng, 2016	Department of Biochemistry and Molecular Biology and Research Center for Emerging Viral Infections, College of Medicine, Chang Gung University, Taoyuan, Taiwan
		miR-526a	CyLD	EV71	inhibitory	cell experiment	Downregulation of MicroRNA miR-526a by Enterovirus Inhibits RIGI-Dependent Innate Immune Response	Changzhi Xu & Xiao Yang, 2014	Beijing Institute of Biotechnology, Beijing, China
		miR-146a	SOS1	EV71	induced cell apoptosis	cell experiment	miR-146a and miR-370 coordinate enterovirus 71-induced cell apoptosis through targeting SOS1 and GADD45β	Ya-Ling Chang & Sung-Liang Yu, Pan-Chyr Yang, 2015	Institute of Molecular Medicine, College of Medicine, National Taiwan University, Taipei, Taiwan.
		miR-370	Gadd45β	EV71	induced cell apoptosis	cell experiment	miR-146a and miR-370 coordinate enterovirus 71-induced cell apoptosis through targeting SOS1 and GADD45β	Ya-Ling Chang & Sung-Liang Yu, Pan-Chyr Yang, 2015	Institute of Molecular Medicine, College of Medicine, National Taiwan University, Taipei, Taiwan.
		miR-124	IL-6R, STAT3	EV71	promoting	cell experiment	Enterovirus 71 antagonizes the antiviral activity of host STAT3 and IL-6R with partial dependence on virus-induced miR-124	Zhangmei Chang & Jian-Er Long, 2017	Key Laboratory of Medical Molecular Virology of Ministries of Education and Health, Shanghai Medical College of Fudan University, Shanghai 200032, PR China;
		HAS-miR-21	MyD88, IRAK1	EV71	promoting	cell experiment	Enterovirus 71-induced has-miR-21 contributes to evasion of host immune system by targeting MyD88 and IRAK1	Zhangmei Chang & Jian-Er Long, 2017	Key Laboratory of Medical Molecular Virology of Ministries of Education and Health, Shanghai Medical College of Fudan University, Shanghai 200032, PR China;
		miR-141	eIF4E	EV71	promoting	cell experiment	Enterovirus-Induced miR-141 Contributes to Shutoff of Host Protein Translation by Targeting the Translation Initiation Factor Eif4e	Bing-Ching Ho & Chun-Nan Lee, Pan-Chyr Yang, 2010	Department of Clinical Laboratory Sciences and Medical Biotechnology
		miR-146a	TRAF6, IRAK1, STAT1	EV71	promoting	animal and cell experiments	Exosome-mediated miR-146a transfer suppresses type I interferon response and facilitates EV71 infection.	Yuxuan Fu & Zhiwei Wu1, 2017	Center for Public Health Research, Medical School, Nanjing University, Nanjing, PR China
		miR-146a	TRAF6, IRAK1	EV71	promoting	animal and cell experiments	Inhibition of miR-146a prevents enterovirus-induced death by restoring the production of type I interferon	Bing-Ching Ho & Sung-Liang Yu, 2014	Department of Clinical Laboratory Sciences and Medical Biotechnology, College of Medicine, National T aiwan University, T aipei 100, T aiwan
		miR-432	SOCS5	JEV	inhibitory	animal and cell experiments	Japanese Encephalitis Virus exploits the microRNA-432 to regulate the expression of Suppressor of Cytokine Signaling (SOCS) 5	Nikhil Sharma & Sunit K. Singh, 2016	Laboratory of Neurovirology and Inflammation Biology, CSIR-Centre for Cellular and Molecular Biology (CCMB), Uppal Road, Hyderabad-500007, India
		miR-125b-5p	STAT3, Map2k7, TRIAP1	JEV	Maintain persistent virus infection	cell experiment	Differential miRNA Expression Profiling Reveals Correlation of miR125b-5p with Persistent Infection of Japanese Encephalitis Virus	Chih-Wei Huang & Ruey-Yi Chang, 2021	Department of Life Science, National Dong Hwa University , Hualien 97401, Taiwan;
		miR-33a-5p	EEF1A1	JEV	inhibitory	cell experiment	MicroRNA-33a-5p Modulates Japanese Encephalitis Virus Replication by Targeting Eukaryotic Translation Elongation Factor 1A1	Zheng Chen & Shengbo Cao, 2016	State Key Laboratory of Agricultural Microbiology, Huazhong Agricultural University, Wuhan, Hubei, People’s Republic of China
		miR-15b	RNF125	JEV	Increase inflammatory cytokines	animal and cell experiments	MicroRNA-15b Modulates Japanese Encephalitis Virus– Mediated Inflammation via Targeting RNF125	Bibo Zhu & Shengbo Cao, 2015	State Key Laboratory of Agricultural Microbiology, Huazhong Agricultural University, Wuhan, Hubei 430070
		miR-124	Dynamin2	JEV	inhibitory	cell experiment	miR-124 attenuates Japanese encephalitis virus replication by targeting DNM2	Songbai Yang & Mengjin Zhu, Ayong Zhao, 2016	College of Animal Science and Technology, Zhejiang A & F University, Lin’an, Zhejiang 311300, China
		miR-146a	TRAF6, IRAK1, IRAK2	JEV	promoting	cell experiment	miR-146a suppresses cellular immune response during Japanese encephalitis virus JaOArS982 strain infection in human microglial cells	Nikhil Sharma1 & Sunit K Singh, 2015	Laboratory of Neurovirology and Inflammation Biology, CSIR-Centre for Cellular and Molecular Biology (CCMB), Uppal Road, 500007 Hyderabad, AP, India
		miRNA-133a	PTB	DENV	inhibitory	cell experiment	Complex interaction between dengue virus replication and expression of miRNA-133a	Jorge Andrés Castillo & Silvio Urcuqui-Inchima1, 2016	Grupo Inmunovirología, Facultad de Medicina, Universidad de Antioquia UdeA, Calle 70 No. 52-21, Medellin, Colombia
		miR-146a	TRAF6	DENV	promoting	cell experiment	miR-146a facilitates replication of dengue virus by dampening interferon induction by targeting TRAF6	Siyu Wu & Ping Zhang, Xi Huang, 2013	Department of Immunology, Institute of Human Virology, Zhongshan School of Medicine, Sun Yat-sen University, Guangzhou 510080, China
		let-7c	BACH1	DENV	inhibitory	cell experiment	Let-7c overexpression inhibits dengue virus replication in human hepatoma Huh-7 cells	Manuel Escalera-Cueto & Martha Yocupicio-Monroy, 2014	Posgrado en Ciencias Genómicas, Universidad Autónoma de la Ciudad de México, Distrito Federal, Plantel del Valle, San Lorenzo 290, Col. Del Valle, México DF, CP 03100, Mexico
		miR-30E*	IkBα	DENV	inhibitory	cell experiment	MicroRNA-30e* Suppresses Dengue Virus Replication by Promoting NF-kB–Dependent IFN Production	Xun Zhu & Mengfeng Li, 2014	Key Laboratory of Tropical Disease Control (Sun Yat-sen University), Ministry of Education, Guangzhou, China,
		HS_154	CTCF, ECOP	WNV	inhibitory	cell experiment	The combinational therapy of miR-27b and doxorubicin shows synergistic therapeutic effect on liver cancers in vivo	Jessica L. Smith, & Alec J. Hirsch, 2012	Vaccine and Gene Therapy Institute, Oregon Health and Science University, Beaverton, Oregon, USA
		miR-532-5p	SESTD1, Tab3	WNV	inhibitory	cell experiment	Human MicroRNA miR-532-5p Exhibits Antiviral Activity against West Nile Virus via Suppression of Host Genes SESTD1 and TAB3 Required for Virus Replication	Andrii Slonchak & Alexander A. Khromykh, 2015	Australian Infectious Diseases Research Centre, School of Chemistry and Molecular Biosciences, The University of Queensland, St Lucia, QLD, Australia
		miR-142-5p	IL6ST, ITGAV	ZIKV	inhibitory	cell experiment	mRNA and miRNA profiling of Zika virus-infected human umbilical cord mesenchymal stem cells identifies miR-142-5p as an antiviral factor	Rak-Kyun Seonga & Mukesh Kumar c and Ok Sarah Shina , 2020	Department of Biomedical Sciences, College of Medicine, Korea University Guro Hospital, Seoul, Republic of Korea;
		miR-29b	caspase-7, NAIF1	BVDV	attenuates apoptosis	cell experiment	bta-miR-29b attenuates apoptosis by directly targeting caspase-7 and NAIF1 and suppresses bovine viral diarrhea virus replication in MDBK cells	Qiang Fu & Chuangfu Chen , 2014	College of Animal Science and Technology, Shihezi University, Shihezi 832003, Xinjiang, People’s Republic of China
		miR-29b	ATG14, ATG9A	BVDV	inhibitory	cell experiment	Lentivirus-mediated bta-miR-29b overexpression interferes with bovine viral 3 diarrhea virus replication and viral infection-related autophagy by directly 4 targeting ATG14 and ATG9A in MDBK cells	Qiang Fu & Chuangfu Chen , 2015	College of Animal Science and Technology, Shihezi University, Shihezi 832003, 9 Xinjiang, People’s Republic of China
		miR-128	TNPO3	HIV	inhibitory	cell experiment	Interferon-Inducible MicroRNA miR-128 Modulates HIV-1 Replication by Targeting TNPO3 mRNA	Aurore Bochnakian & Irene Munk Pedersena, 2019	Department of Molecular Biology and Biochemistry, Francisco J. Ayala School of Biological Sciences, University of California—Irvine, Irvine, California, USA
		hsa-miR-191-5p	NUP50	HIV	inhibitory	cell experiment	hsa-miR-191-5p inhibits replication of human immunodeficiency virus type 1 by downregulating the expression of NUP50	Yanghao Zheng & Nanping Wu, 2021	State Key Laboratory for Diagnosis and Treatment of Infectious Diseases, National Clinical Research Centre for Infectious Diseases, Collaborative Innovation Centre for Diagnosis and Treatment of Infectious Diseases, The First Affiliated Hospital, Zhejiang University, Hangzhou 310003, China
		miR-198	Cyclin T1	HIV	inhibitory	cell experiment	miR-198 Inhibits HIV-1 Gene Expression and Replication in Monocytes and Its Mechanism of Action Appears To Involve Repression of Cyclin T1	Tzu-Ling Sung & Andrew P. Rice, 2009	Department of Molecular Virology and Microbiology, Baylor College of Medicine, Houston, Texas, United States of America
		miR-17-5p	PCAF	HIV	inhibitory	cell experiment	Suppression of MicroRNA-Silencing Pathway by HIV-1 During Virus Replication	Robinson Triboulet & Monsef Benkirane1, 2007	Laboratoire de Virologie Moléculaire, Institut de Génétique Humaine, Montpellier, France.
		miR-20a	PCAF	HIV	inhibitory	cell experiment	Suppression of MicroRNA-Silencing Pathway by HIV-1 During Virus Replication	Robinson Triboulet & Monsef Benkirane1, 2007	Laboratoire de Virologie Moléculaire, Institut de Génétique Humaine, Montpellier, France.
		miR-27b	Cyclin T1	HIV	inhibitory	cell experiment	Regulation of Cyclin T1 and HIV-1 Replication by MicroRNAs in Resting CD4 T Lymphocytes	Karen Chiang & Andrew P. Rice, 2012	Department of Molecular Virology and Microbiology, a and Interdepartmental Program in Translational Biology and Molecular Medicine
		miRNA-1236	VprBP	HIV	inhibitory	cell experiment	miRNA-1236 Inhibits HIV-1 Infection of Monocytes by Repressing Translation of Cellular Factor VprBP	Li Ma & Jian-Hua Wang，2014	Jiangsu Key Laboratory of Infection and Immunity, Institutes of Biology & Medical Sciences, Soochow University, Suzhou, China,
		miR-331-3p	NRP2	HPV	Suppresses Cervical Cancer Cell Proliferation and E6/E7 Expression	cell experiment	MicroRNA-331-3p Suppresses Cervical Cancer Cell Proliferation and E6/E7 Expression by Targeting NRP2	Tomomi Fujii & Tomomi Fujii, 2016	Department of Pathology , Nara Medical University School of Medicine, Nara 634-8521, Japan
		miR-129-5p	SP1	HPV	down-regulates HPV-18 E6 and E7 viral gene expression	cell experiment	Interferon-beta induced microRNA-129-5p down-regulates HPV-18 E6 and E7 viral gene expression by targeting SP1 in cervical cancer cells	Jiarong Zhang, & Shuangdi Li, Xiaoping Wan, 2013	Shanghai First People’s Hospital Affiliated to Shanghai Jiao Tong University, Shanghai, China
		miR-373	IRF1	HSV-1	promoting	cell experiment	MicroRNA-373 facilitates HSV-1 replication through suppression of type I IFN response by targeting IRF1	Yiting Xie & Jinhua Wang, 2017	Department of Pediatric Dentistry, The Affiliated Stomatology Hospital of Chongqing Medical University, Chongqing 400015, China
		HSV-miR-LAT	TGF-β, Smad3	HSV-1	Inhibit cell apoptosis and maintain virus latent infection	cell experiment	Anti-apoptotic function of a microRNA encoded by the HSV-1 latency-associated transcript	A. Gupta, 2006	Department of Microbiology, University of Pennsylvania School of Medicine
		miR-101	ATP5B	HSV-1	inhibitory	cell experiment	MiR-101 regulates HSV-1 replication by targeting ATP5B	Shu-qi Zheng & Hua Tang , 2011	Tianjin Life Science Research Center and Basic Medical School, Tianjin Medical University, No. 22 Qi-Xiang-Tai Road, Tianjin 300070, China
		miR-23a	IRF1	HSV-1	promoting	cell experiment	MiR-23a Facilitates the Replication of HSV-1 through the Suppression of Interferon Regulatory Factor 1	Jing Ru & Hua Tang, 2014	Tianjin Life Science Research Center and Department of Microbiology, School of Basic Medical Sciences, Tianjin Medical University, Tianjin 300070, China
		HCMV-miR-UL112	MICB	HCMV	promoting	cell experiment	Host Immune System Gene Targeting by a Viral miRNA	Noam Stern-Ginossar & Yael Altuvia, Hanah Margalit2, Ofer Mandelboim1, 2007	Lautenberg Center for General and Tumor Immunology, Hebrew University Hadassah Medical School, Jerusalem, Israel
		miR-138	SIRT1	HCMV	promotes migration and tube formation of human cytomegalovirus-infected endothelial cells	cell experiment	miR-138 promotes migration and tube formation of human cytomegalovirus-infected endothelial cells through the SIRT1/pSTAT3 pathway	Shanchao Zhang & Jiawei Wang, 2017	Department of Neurology, Beijing Friendship Hospital, Capital Medical University, Beijing 100050, China
		KSHV-miRNAs	THBS1	KSHV	Promotes proliferation of infected cells and maintains an environment of persistent viral infection	cell experiment	Identification of Cellular Genes Targeted by KSHV-Encoded MicroRNAs	Mark A. Samols & Rolf Renne, 2007	Department of Molecular Genetics and Microbiology, University of Florida College of Medicine, Gainesville, Florida, United States of America
		miR-132	p300	KSHV	promoting	cell experiment	miR‑132 regulates antiviral innate immunity through suppression of the p300 transcriptional co‑activator	Dimitrios Lagos & Dimitrios Lagos, Chris Boshoff, 2010	Cancer Research UK Viral Oncology Group, UCL Cancer Institute, Paul O’Gorman Building, 72 Huntley Street, University College London, London WC1E 6BT.
		host derived miR-141	FOXO3	EBV	promoting	cell experiment	B Cell Receptor-Responsive miR-141 Enhances Epstein-Barr Virus Lytic Cycle via FOXO3 Inhibition	Yan Chen & Rebecca L. Skalskya, 2021	Vaccine and Gene Therapy Institute, Oregon Health & Science University, Beaverton, Oregon, USA
		virus derived miR-BART9	FOXO3	EBV	promoting	cell experiment	B Cell Receptor-Responsive miR-141 Enhances Epstein-Barr Virus Lytic Cycle via FOXO3 Inhibition	Yan Chen & Rebecca L. Skalskya, 2021	Vaccine and Gene Therapy Institute, Oregon Health & Science University, Beaverton, Oregon, USA
		miR-340-5p	ATF7	HBV	regulated growth of liver cancer cells	cell experiment	Hepatitis B virus-regulated growth of liver cancer cells occurs through the microRNA-340-5p-activating transcription factor 7-heat shock protein A member 1B axis	Feifei Song & Lang Chen1, Guihong Sun, 2019	School of Basic Medical Sciences, Wuhan University, Wuhan, China
		miR-325-3p	AQP5	HBV	inhibitory	cell experiment	MicroRNA-325-3p inhibits cell proliferation and induces apoptosis in hepatitis B virus-related hepatocellular carcinoma by down-regulation of aquaporin 5	Zhitao Zhang & Yanzhen Han, 2019	General Surgery V Ward, Affiliated Hospital of Hebei Engineering University, Handan 056002, Hebei Province, People’s Republic of China
		miR-146a	RIG-I, RIG-G	HBV	promoting	animal and cell experiments	Hepatitis B virus inhibits intrinsic RIG-I and RIG-G immune signaling via inducing miR146a	Zhaohua Hou & Jian Zhang, Zhigang Tian, 2016	Institute of Immunopharmaceutical Sciences, School of Pharmaceutical Sciences, Shandong University, China.
		miR-122	Cyclin G1	HBV	inhibitory	cell experiment	Loss of MicroRNA 122 Expression in Patients with Hepatitis B Enhances Hepatitis B Virus Replication Through Cyclin G1-Modulated P53 Activity	Saifeng Wang & Zhongping Duan, Songdong Meng, 2012	CAS Key Laboratory of Pathogenic Microbiology and Immunology, Institute of Microbiology, Chinese Academy of Sciences (CAS), Beijing, P .R. China;
		miR-125b	SCNN1A	HBV	inhibitory	cell experiment	miR-125b inhibits hepatitis B virus expression in vitro through targeting of the SCNN1A gene	Zhenzhen Zhang & Quanbo Liu , 2014	Department of Infectious Disease, Children’s Hospital of Chongqing Medical University, No 136 ZhongShan Er Road, 400012 Chongqing, China
		miR-101	FOXO1	HBV	inhibitory	cell experiment	miR-101 suppresses HBV replication and expression by targeting FOXO1 in hepatoma carcinoma cell lines	Yanjing Wang & Yanjing Wang, 2017	Department of Infectious Disease, Huaihe Hospital of Henan University, Kaifeng 475000, China
		miR-449a	CREB5	HBV	promoting	cell experiment	Epigenetically regulated miR449a enhances hepatitis B virus replication by targeting cAMPresponsive element binding protein 5 and modulating hepatocytes phenotype	Xiaoyong Zhang & Mengji Lu1	Institute of Virology, University Hospital of Essen, University of Duisburg-Essen, Essen, Germany.
		miR-182	CLDN1	HCV	inhibitory	cell experiment	Disruption of Claudin-1 Expression by miRNA-182 Alters the Susceptibility to Viral Infectivity in HCV Cell Models	Sarah E. Riad & Ahmed I. Abdelaziz, 2018	Pharmacology and Toxicology Department, German University in Cairo, New Cairo, Egypt
		miR-130a	ATG5	HCV	inhibitory	cell experiment	Microrna-130a Downregulates HCV Replication through an atg5-Dependent Autophagy Pathway	Xiaoqiong Duan & Limin Chen, Wenyu Lin, 2019	lnstitute of Blood Transfusion, Chinese Academy of Medical Sciences and Peking Union Medical College, Chengdu 610052, China;
		miR-130a	PKLR	HCV	inhibitory	cell experiment	MicroRNA 130a Regulates both Hepatitis C Virus and Hepatitis B Virus Replication through a Central Metabolic Pathway	Xiaoqiong Duan & Raymond T. Chung, 2018	Institute of Blood Transfusion, Chinese Academy of Medical Sciences and Peking 8 Union Medical College, 610052 Chengdu, China
		miR-155	SOCS1	HCV	Pro - and anti-inflammatory mediators are triggered, balancing immune clearance and damage	cell experiment	miR-155 regulates pro- and anti-inflammatory cytokine expression in human monocytes during chronic hepatitis C virus infection	Yun Zhou & Chao Fan, Ying Zhang, 2021	Department of Infectious Diseases, T angdu Hospital, Fourth Military Medical University, Xi’an, China
		miR-21	MyD88, IRAK1	HCV	promoting	cell experiment	HCV-Induced miR-21 Contributes to Evasion of Host Immune System by Targeting MyD88 and IRAK1	Yanni Chen & Jianguo Wu, 2013	State Key Laboratory of Virology, College of Life Sciences, and Chinese-French Liver Disease Research Institute at Zhongnan Hospital, Wuhan University, Wuhan, Hubei, People9s Republic of China,
		miR-373	JAK1, IRF9	HCV	promoting	cell experiment	Hepatitis C Virus-Mediated Enhancement of MicroRNA miR-373 Impairs the JAK/STAT Signaling Pathway	Anupam Mukherjee & Ratna B. Ray, 2015	Departments of Pathologya and Internal Medicine, b Saint Louis University, St. Louis, Missouri, USA
		miR-130a	IFITM1	HCV	promoting	cell experiment	Hepatitis C Virus Infection Modulates Expression of Interferon Stimulatory	Joydip Bhanja Chowdhury & Ranjit Ray, Ratna B. Ray, 2012	Departments of Pathology, Saint Louis University, Saint Louis, Missouri, USA
		hsa-miR-4521	FAM129A	NDV	inhibitory	cell experiment	Differential microRNA Expression in Newcastle Disease Virus-Infected HeLa Cells and Its Role in Regulating Virus Replication	Yu Chen & Xiufan Liu , 2021	Animal Infectious Disease Laboratory, College of Veterinary Medicine, Yangzhou University, Yangzhou, China
		gga-miR-19b-3p	RNF11, ZMYND11	NDV	inhibitory	cell experiment	Gga-miR-19b-3p Inhibits Newcastle Disease Virus Replication by Suppressing Inflammatory Response via Targeting RNF11 and ZMYND11	Yu Chen & Xiufan Liu , 2019	Animal Infectious Disease Laboratory, College of Veterinary Medicine, Yangzhou University, Yangzhou, China,
		gga-miR-455-5p	SOCS3	NDV	inhibitory	cell experiment	MicroRNA gga-miR-455-5p suppresses Newcastle disease virus replication via targeting cellular suppressors of cytokine signaling 3	Xiangwei Wang & Xinglong Wanga, Zengqi Y anga, 2019	College of V eterinary Medicine, Northwest A & F University, Y angling 712100, China
		miR-375	ELAVL4	NDV	promoting	cell experiment	MiR-375 Has Contrasting Effects on Newcastle Disease Virus Growth Depending on the Target Gene.	Xinglong Wang & Zengqi Yang, 2019	College of Veterinary Medicine, Northwest A & F University, Yangling, Shaanxi Province 712100, PR China
		miR-218	SLAM	PRRSV	inhibitory	cell experiment	MicroRNA-218 Regulates Signaling Lymphocyte Activation Molecular (SLAM) Mediated Peste des Petits Ruminants Virus Infectivity in Goat Peripheral Blood Mononuclear Cells	Xuefeng Qi & Jingyu Wang, 2019	College of Veterinary Medicine, Northwest A & F University, Yangling, China
		miR-373	NFIA, NFIB, IRAK1, IRAK4, IRF1	PRRSV	promoting	cell experiment	icroRNA 373 Facilitates the Replication of Porcine Reproductive and Respiratory Syndrome Virus by Its Negative Regulation of Type I Interferon Induction	Jing Chen & Xibao Shi, Gai-Ping Zhang, 2017	College of Animal Science and Veterinary Medicine, Jilin University, Changchun, China
		let-7b	INF-β	PRRSV	promoting	cell experiment	Porcine reproductive and respiratory syndrome virus suppresses post-transcriptionally the protein expression of IFN-beta by upregulating cellular microRNAs in porcine alveolar macrophages in vitro	LILIN W ANG1 & HANCHUN Y ANG1, 2018	Key Laboratory of Animal Epidemiology of Ministry of Agriculture, College of V eterinary Medicine and State Key Laboratory of Agrobiotechnology, China Agricultural University, Beijing 100193;
		miR-26a	INF-β	PRRSV	promoting	cell experiment	Porcine reproductive and respiratory syndrome virus suppresses post-transcriptionally the protein expression of IFN-beta by upregulating cellular microRNAs in porcine alveolar macrophages in vitro	LILIN W ANG1 & HANCHUN Y ANG1, 2018	Key Laboratory of Animal Epidemiology of Ministry of Agriculture, College of V eterinary Medicine and State Key Laboratory of Agrobiotechnology, China Agricultural University, Beijing 100193;
		miR-34a	INF-β	PRRSV	promoting	cell experiment	Porcine reproductive and respiratory syndrome virus suppresses post-transcriptionally the protein expression of IFN-beta by upregulating cellular microRNAs in porcine alveolar macrophages in vitro	LILIN W ANG1 & HANCHUN Y ANG1, 2018	Key Laboratory of Animal Epidemiology of Ministry of Agriculture, College of V eterinary Medicine and State Key Laboratory of Agrobiotechnology, China Agricultural University, Beijing 100193;
		miR-145	INF-β	PRRSV	promoting	cell experiment	Porcine reproductive and respiratory syndrome virus suppresses post-transcriptionally the protein expression of IFN-beta by upregulating cellular microRNAs in porcine alveolar macrophages in vitro	LILIN W ANG1 & HANCHUN Y ANG1, 2018	Key Laboratory of Animal Epidemiology of Ministry of Agriculture, College of V eterinary Medicine and State Key Laboratory of Agrobiotechnology, China Agricultural University, Beijing 100193;
		miR-30c	IFNAR2	PRRSV	promoting	cell experiment	MicroRNA-30c targets the interferon-alpha/beta receptor beta chain to promote type 2 PRRSV infection	Fang Liu, & Wen-hai Feng, 2018	State Key Laboratory of Agrobiotechnology and Beijing Advanced Innovation Center for Food Nutrition and Human Health, College of Biological Sciences, China Agricultural University, Beijing 100193, PR China;
		miR-382-5p	HSP60	PRRSV	promoting	cell experiment	miR-382-5p promotes porcine reproductive and respiratory syndrome virus (PRRSV) replication by negatively regulating the induction of type I interferon	Xiaobo Chang & Gaiping Zhang, 2020	Henan Provincial Key Laboratory of Animal Immunology, Henan Academy of Agricultural Sciences, Zhengzhou, China
		miR-218	SOCS3	PRRSV	inhibitory	cell experiment	Downregulation of miR-218 by porcine reproductive and respiratory syndrome virus facilitates viral replication via inhibition of type I interferon responses	Lin Zhang & Yue Wang, 2021	From the State Key Laboratory of Veterinary Biotechnology, National Poultry Laboratory Animal Resource Center, Heilongjiang Provincial Key Laboratory of Laboratory Animal and Comparative Medicine, Harbin Veterinary Research Institute, Chinese Academy of Agricultural Sciences, Harbin, China
		miR-24-3p	HO-1	PRRSV	promoting	cell experiment	MicroRNA miR-24-3p Promotes Porcine Reproductive and Respiratory Syndrome Virus Replication through Suppression of Heme Oxygenase-1 Expression	Shuqi Xiao, a, b Xue Wang, a, b Huaibao Ni, a, b Na Li, a, b Angke Zhang, a, b Hongliang Liu, a, b Fengxing Pu & En-Min Zhou, 2015	College of Veterinary Medicine, Northwest A & F University, Shaanxi, China
		gga-miR-16-5p	Bcl2	IBDV	promoting	cell experiment	Epigenetic Upregulation of Chicken MicroRNA-16-5p Expression in DF-1 Cells following Infection with Infectious Bursal Disease Virus (IBDV) Enhances IBDV-Induced Apoptosis and Viral Replication.	Xueyan Duan, & Shijun J. Zheng, 2020	Key Laboratory of Animal Epidemiology of the Ministry of Agriculture, Beijing, China
		miR-27b-3p	SOCS3, SOCS6	IBDV	inhibitory	cell experiment	gga-miR-27b-3p enhances type I interferon expression and suppresses infectious bursal disease virus replication via targeting cellular suppressors of cytokine signaling 3 and 6 (SOCS3 and 6)	Xueyan Duan & Yongqiang Wang, Shijun J. Zheng, 2020	Key Laboratory of Animal Epidemiology of the Ministry of Agriculture
		gga-miR-130b	SOCS5	IBDV	inhibitory	cell experiment	MicroRNA gga-miR-130b Suppresses Infectious Bursal Disease Virus Replication via Targeting of the Viral Genome and Cellular Suppressors of Cytokine Signaling 5	Mengjiao Fu & Shijun J. Zheng, 2018	State Key Laboratory of Agrobiotechnology, Beijing, China
		gga-miR-454	SOCS6	IBDV	inhibitory	cell experiment	gga-miR-454 suppresses infectious bursal disease virus (IBDV) replication via directly targeting IBDV genomic segment B and cellular Suppressors of Cytokine Signaling 6 (SOCS6)	Mengjiao Fu & Shijun J. Zheng, 2018	State Key Laboratory of Agrobiotechnology, China Agricultural University, Beijing 100193, China
		gga-miR-155	SOCS1, TANK	IBDV	inhibitory	cell experiment	gga-miR-155 Enhances Type I Interferon Expression and Suppresses Infectious Burse Disease Virus Replication via T argeting SOCS1 and TANK	Bin Wang & Shijun J. Zheng, 2018	State Key Laboratory of Agrobiotechnology and College of Veterinary Medicine, China Agricultural University, Beijing, China,
		gga-miR-9*	IRF2	IBDV	promoting	animal and cell experiments	gga-miR-9* inhibits IFN production in antiviral innate immunity by targeting interferon regulatory factor 2 to promote IBDV replication	Wei Ouyang & Yong-shan Wang , Hai-bin Zhang, 2015	College of Veterinary Medicine, Nanjing Agricultural University, Nanjing 210095, China
		gga-miR-2127	P53	IBDV	promoting	cell experiment	gga-miR-2127 downregulates the translation of chicken p53 and attenuates chp53-mediated innate immune response against IBDV infection	Wei Ouyang & Yong-shan Wang , Kai Luoc, 2015	Institute of Veterinary Medicine, Jiangsu Academy of Agricultural Sciences/Key Laboratory of Veterinary Biological Engineering and Technology, Ministry of Agriculture/National Center for Engineering Research of Veterinary Bio-products, Nanjing 210014, China
		gga-miR-142-5p	MDA5	IBDV	promoting	cell experiment	gga-miR-142-5p attenuates IRF7 signaling and promotes replication of IBDV by directly targeting the chMDA5′s 3′ untranslated region	Wei Ouyang & Yong-shan Wang , 2018	Institute of Veterinary Medicine, Jiangsu Academy of Agricultural Sciences/Key Laboratory of Veterinary Biological Engineering and Technology, Ministry of Agriculture, Nanjing 210014, China
		gga-miR-155	RORA	MDV	cell proliferation, apoptosis	cell experiment	Effect of gga-miR-155 on cell proliferation, apoptosis and invasion of Marek's disease virus (MDV) transformed cell line MSB1 by targeting RORA	Ke Ding & Zu-Hua Yu, 2020	Key Laboratory of Animal Disease and Public Health, Henan University of Science and Technology, Luoyang 471003, People’s Republic of China
		miR-1225-3p	GAB3	HCV, SeV, NDV	promoting	cell experiment	Interferon down-regulation of miR-1225-3p as an antiviral mechanism through modulating Grb2-associated binding protein 3 expression	Min Cheng & Wei Yang, 2018	MOH Key Laboratory of Systems Biology of Pathogens, Institute of Pathogen Biology, Chinese Academy of Medical Sciences and Peking Union Medical College, Beijing 100176, China
		miR-92a	DDX58	VSV	promoting	cell experiment	MicroRNA-92a inhibits macrophage antiviral response by targeting retinoic acid inducible gene-I	Yuanjian Sheng & Yuanyuan Zhang, 2018	Children’s Hospital, Zhejiang University School of Medicine, Hangzhou, China
		miR-223	FOXO3	VSV	inhibitory	cell experiment	MicroRNA-223 Promotes Type I Interferon Production in Antiviral Innate Immunity by Targeting Forkhead Box Protein O3 (FOXO3)*	Luoquan Chen & Yang Liu, Qingqing Wang, 2016	From the Institute of Immunology, Zhejiang University School of Medicine, Hangzhou 310058, China
		miR-146a	TRAF6, IRAK1, IRAK2	VSV	promoting	cell experiment	MicroRNA-146a Feedback Inhibits RIG-I-Dependent Type I IFN Production in Macrophages by Targeting TRAF6, IRAK1, and IRAK2	Jin Hou, & Zhugang Wang, Xuetao Cao, 2009	Institute of Immunology, Tsinghua University School of Medicine, Beijing, China;
		BmCPV-miR-10	BmCSDE1	BmCPV	promoting	animal and cell experiments	Functional analysis of a putative Bombyx mori cypovirus miRNA BmCPV-miR-10 and its effect on virus replication	Y. Wang & X. Guo, 2021	School of Biotechnology, Jiangsu University of Science and Technology, Zhenjiang, China; and †Sericulture Research Institute, Chinese Academy of Agricultural Sciences, Zhenjiang, China
		miR-10c	LvToll3	WSSV	promoting	animal experiment	miR-10c Facilitates White Spot Syndrome Virus Infection by Targeting Toll3 in Litopenaeus vannemei	Hongliang Zuo & Jianguo He, Xiaopeng Xu, 2021	State Key Laboratory of Biocontrol, School of Life Sciences, Sun Yat-Sen University, Guangzhou, China
		miR-9041	STAT	WSSV	promoting	animal and cell experiments	Two host microRNAs influence WSSV replication via STAT gene regulation	Ying Huang & Qian Ren, 2016	Jiangsu Key Laboratory for Biodiversity & Biotechnology and Jiangsu Key Laboratory for Aquatic Crustacean Diseases, College of Life Sciences, Nanjing Normal University, Nanjing 210046, China.
		miR-9850	STAT	WSSV	promoting	animal and cell experiments	Two host microRNAs influence WSSV replication via STAT gene regulation	Ying Huang & Qian Ren, 2016	Jiangsu Key Laboratory for Biodiversity & Biotechnology and Jiangsu Key Laboratory for Aquatic Crustacean Diseases, College of Life Sciences, Nanjing Normal University, Nanjing 210046, China.
		WSSV-miR-N24	caspase 8	WSSV	promoting	animal and cell experiments	Involvement of viral microRNA in the regulation of antiviral apoptosis in shrimp	Tianzhi Huang & Xiaobo Zhang, 2014	Collaborative Innovation Center of Deep Sea Biology, Key Laboratory of Animal Virology of Ministry of Agriculture and College of Life Sciences, Zhejiang University, Hangzhou, The People’s Republic of China
		WSSV-miR-N13	dorsal	WSSV	promoting	animal and cell experiments	Two White Spot Syndrome Virus MicroRNAs Target the Dorsal Gene To Promote Virus Infection in Marsupenaeus japonicus Shrimp	Qian Ren & Xiaobo Zhanga, 2017	Laboratory for Marine Biology and Biotechnology of Qingdao National Laboratory for Marine Science and Technology and College of Life Sciences, Zhejiang University, Hangzhou, People's Republic of China
		WSSV-miR-N23	dorsal	WSSV	promoting	animal and cell experiments	Two White Spot Syndrome Virus MicroRNAs Target the Dorsal Gene To Promote Virus Infection in Marsupenaeus japonicus Shrimp	Qian Ren & Xiaobo Zhanga, 2017	Laboratory for Marine Biology and Biotechnology of Qingdao National Laboratory for Marine Science and Technology and College of Life Sciences, Zhejiang University, Hangzhou, People's Republic of China
		WSSV-miR-22	STAT	WSSV	promoting	animal and cell experiments	A white spot syndrome virus microRNA promotes the virus infection by targeting the host STAT	Qian Ren & Xiaobo Zhang, 2015	Key Laboratory of Animal Virology of Ministry of Agriculture and College of Life Sciences, Zhejiang University, Hangzhou 310058, People’s Republic of China
		miR-965	ATG5	WSSV	inhibitory	animal and cell experiments	The role of shrimp miR-965 in virus infection	Le Shu & Changrun Li, Xiaobo Zhang, 2016	College of Life Sciences, Zhejiang University, Hangzhou 310058, People's Republic of China
		miR-31	PVRL4	MV	inhibitory	animal and cell experiments	MiR-31 and miR-128 regulates poliovirus receptor-related 4 mediated measles virus infectivity in tumors	Hirosha Geekiyanage & Hirosha Geekiyanage, Evanthia Galanis, 2016	Department of Molecular Medicine, Division of Medical Oncology, Mayo Clinic, Rochester, MN 55902, USA
		miR-128	PVRL4	MV	inhibitory	animal and cell experiments	MiR-31 and miR-128 regulates poliovirus receptor-related 4 mediated measles virus infectivity in tumors	Hirosha Geekiyanage & Hirosha Geekiyanage, Evanthia Galanis, 2016	Department of Molecular Medicine, Division of Medical Oncology, Mayo Clinic, Rochester, MN 55902, USA
		miR-485	RIG-I	NDV、H5N1	promoting	cell experiment	The microRNA miR-485 targets host and influenza virus transcripts to regulate antiviral immunity and restrict viral replication	Harshad Ingle & Himanshu Kumar, 2015	Laboratory of Immunology, Department of Biological Sciences, Indian Institute of Science Education and Research, Bhopal 462066, India.
		miR-100	mRNA of trypsin gene	WSSV	promoting	animal and cell experiments	The miR-100-mediated pathway regulates apoptosis against virus infection in shrimp	Lu Yang & Xiaobo Zhang, 2014	Key Laboratory of Animal Virology of Ministry of Agriculture and College of Life Sciences, Zhejiang University, Hangzhou 310058, People's Republic of China
5'UTR	up-regulating the translation of target mRNA	/	/	/	/	/	/	/	/
	Down-regulating the translation of target mRNA	miR-34a	p18Ink4c	HPV	Up-regulation of p18Ink4c Expression by Oncogenic HPV E6	cell experiment	Up-Regulation of p18Ink4c Expression by Oncogenic HPV E6 via p53-miR-34a Pathway	Xiaohong Wang & Zhi-Ming Zheng, 2011	Tumor Virus RNA Biology Section, HIV and AIDS Malignancy Branch, Center for Cancer Research, National Cancer Institute, National Institutes of Health, Bethesda, Maryland
						cell experiment
ORF	up-regulating the translation of target mRNA	Kun(WNV)-miR-1	GATA4	WNV	promoting	cell experiment	West Nile virus encodes a microRNA-like small RNA in the 30 untranslated region which up-regulates GATA4 mRNA and facilitates virus replication in mosquito cells	Mazhar Hussain & Sassan Asgari, 2012	School of Biological Sciences, School of Chemistry and Molecular Biosciences, The University of Queensland, Brisbane, QLD 4072, Australia,
	Down-regulating the translation of target mRNA	miR-128	TNPO3	HIV	inhibitory	cell experiment	Interferon-Inducible MicroRNA miR-128 Modulates HIV-1 Replication by Targeting TNPO3 mRNA	Aurore Bochnakian & Irene Munk Pedersena, 2019	Department of Molecular Biology and Biochemistry, Francisco J. Ayala School of Biological Sciences, University of California—Irvine, Irvine, California, USA
		miR-148A-5p	TLR3	DTMUV	promoting	cell experiment	DEF Cell-Derived Exosomal miR-148a-5p Promotes DTMUV Replication by Negative Regulating TLR3 Expression	Hongyan Guo & Renyong Jia, 2020	Research Center of Avian Disease, College of V eterinary Medicine, Sichuan Agricultural University , Chengdu 611130, China;
Unclear	Down-regulating the translation of target mRNA	miRNA-548an	NS1ABP	IAV	inhibitory	cell experiment	Expression of non-structural-1A binding protein in lung epithelial cells is modulated by miRNA-548an on exposure to influenza A virus	Sreekumar Othumpangat & John D. Noti, 2013	Allergy and Clinical Immunology Branch, Health Effects Laboratory Division, National Institute for Occupational Safety and Health, Centers for Disease Control and Prevention, Morgantown, WV 26505-2888, USA
Unclear	Down-regulating the translation of target mRNA	hsa-miR-21-5p	PTEN	CHPV	Increase inflammatory cytokines	cell experiment	Chandipura virus dysregulates the expression of hsa-miR-21-5p to activate NF-κB in human microglial cells	Neha Pandey & Sunit K. Singh，2021	Molecular Biology Unit, Faculty of Medicine, Institute of Medical Sciences, Banaras Hindu University, 221005 Varanasi, India
Unclear	Down-regulating the translation of target mRNA	miR-34a	PNUTS/PPP1R10	HIV	promoting	cell experiment	The miRNA miR-34aenhances HIV-1 replication by targeting PNUTS/PPP1R10, which negatively regulates HIV-1 transcriptional complex formation	Richa Kapoor & Akhil C. Banerjea,2015	Laboratory of Virology, National Institute of Immunology (NII), New Delhi, India
Unclear	Down-regulating the translation of target mRNA	gga-miR-451	YWHAZ	NDV	promoting	cell experiment	MicroRNA Expression Profiling in Newcastle Disease Virus-Infected DF-1 Cells by Deep Sequencing	Yu Chen & Xiufan Liu，2019	Animal Infectious Disease Laboratory, College of Veterinary Medicine, Yangzhou University, Yangzhou, China
Unclear	may regulate LAMB3 expression at the transcriptional level	miR-218	LAMB3	HPV	inhibitory	cell experiment	Human papillomavirus type 16 reduces the expression of microRNA-218 in cervical carcinoma cells	Martinez & SA Khan, 2008	Department of Molecular Genetics and Biochemistry, University of Pittsburgh School of Medicine, Pittsburgh, PA, USA
Unclear	up-regulating the translation of target mRNA	miR-26a	Unclear	PRRSV	inhibitory	cell experiment	Host miR-26a suppresses replication of porcine reproductive and respiratory syndrome virus by upregulating type I interferons	Liwei Li & Guangzhi Tong, 2015	Department of Swine Infectious Diseases, Shanghai Veterinary Research Institute, Chinese Academy of Agricultural Sciences, Shanghai 200241, PR China
Unclear	Unclear	miR-23	Unclear	PRRSV	inhibitory	cell experiment	MicroRNA-23 inhibits PRRSV replication by directly targeting PRRSV RNA and possibly by upregulating type I interferons	Qiong Zhang & Wen-hai Feng , 2014	State Key Laboratory of Agrobiotechnology, College of Biological Sciences, China Agricultural University, Beijing 100193, China
Virus mRNA
3'UTR	up-regulating the translation of target mRNA	miR-17	BVDV	BVDV	promoting	cell experiment	A Broad RNA Virus Survey Reveals Both miRNA Dependence and Functional Sequestration	Troels K. H. Scheel, Joseph M. Luna, Matthias Liniger, Eiko Nishiuchi, Kathryn Rozen-Gagnon & Charles M. Rice, 2016	Laboratory of Virology and Infectious Disease, Center for the Study of Hepatitis C, The Rockefeller University, New Y ork, NY , USA
	Down-regulating the translation of target mRNA	let-7c	M1	HIN1	inhibitory	cell experiment	Cellular microRNA let-7c inhibits M1 protein expression of the H1N1 influenza A virus in infected human lung epithelial cells	Yong-Jie Ma, Jing Yang, Xing-Liang Fan & Zhe Zhou , Sheng-Qi Wang, 2012	Lab of Biotechnology, Beijing Institute of Radiation Medicine, Beijing, China
		has-miR-3145	PB1	H1N1, H5N1, H3N2	inhibitory	cell experiment	Human miR-3145 inhibits influenza A viruses replication by targeting and silencing viral PB1 gene	Kritsada Khongnomnan & Sunchai Payungporn, 2015	Department of Biochemistry, Faculty of Medicine, Chulalongkorn University, Bangkok 10330, Thailand
		miR-221-5p	PEDV	PEDV	inhibitory	cell experiment	MicroRNA-221-5p Inhibits Porcine Epidemic Diarrhea Virus Replication by Targeting Genomic Viral RNA and Activating the NF-kappaB Pathway	Hongqing Zheng & Xingang Xu , Yanming Zhang , 2018	College of V eterinary Medicine, Northwest A & F University , Yangling 712100, China;
		miR-223	N	SARS	inhibitory	cell experiment	MicroRNome Analysis Unravels the Molecular Basis of SARS Infection in Bronchoalveolar Stem Cells	Bibekanand Mallick & Zhumur Ghosh, 2009	Computational Biology Group, Indian Association for the Cultivation of Science, Calcutta, India,
		miR-98	S	SARS	inhibitory	cell experiment	MicroRNome Analysis Unravels the Molecular Basis of SARS Infection in Bronchoalveolar Stem Cells	Bibekanand Mallick & Zhumur Ghosh, 2009	Computational Biology Group, Indian Association for the Cultivation of Science, Calcutta, India,
		miR-525-3p	NSP1	RV	inhibitory	cell experiment	MiR-525-3p mediates antiviral defense to rotavirus infection by targeting nonstructural protein	Zhiqiang Tian & Yuzhang Wu, Zigang Shen, 2017	Institute of Immunology, PLA, Third Military Medical University, Chongqing, China.
		miR-23b	EV71	EV71	inhibitory	cell experiment	MicroRNA-23b Inhibits Enterovirus 71 Replication through Downregulation of EV71 VPl Protein	Bai-ping Wen & Hong-jian Dai, 2013	Kunming Children’s Hospital, Kunming , China
		miR-122-MRE	DENV	DENV	inhibitory	cell experiment	Utilizing liver-specific microRNA-122 to modulate replication of dengue virus replicon	Tai-Chi Lee & Ching-Len Liao, 2010	Graduate Institute of Life Sciences, National Defense Medical Center, Taipei, Taiwan, ROC
		miR-184	DEN4	DENV	inhibitory	animal and cell experiments	Dual miRNA targeting restricts host range and attenuates neurovirulence of flaviviruses	Konstantin A. Tsetsarkin & Alexander G. Pletnev, 2015	Laboratory of Infectious Diseases, National Institute of Allergy and Infectious Diseases, National Institutes of Health, Bethesda, Maryland, United States of America
		miR-275	DEN4	DENV	inhibitory	animal and cell experiments	Dual miRNA targeting restricts host range and attenuates neurovirulence of flaviviruses	Konstantin A. Tsetsarkin & Alexander G. Pletnev, 2015	Laboratory of Infectious Diseases, National Institute of Allergy and Infectious Diseases, National Institutes of Health, Bethesda, Maryland, United States of America
		miR-29	HIV-1	HIV	inhibitory	cell experiment	Celluar microRNA and P-bodies modulate host-HIV-1 interactions	Robin Nathans & Tariq M. Rana, 2009	Department of Biochemistry and Molecular Pharmacology, University of Massachusetts Medical School, Worcester, MA 01605
		EBV-BART-miRNAs	LMP1	EBV	inhibit cancer development	cell experiment	Modulation of LMP1 protein expression by EBV-encoded microRNAs	Angela Kwok Fung Lo & S. Diane Hayward, 2007	Viral Oncology Program, Sidney Kimmel Cancer Center, Johns Hopkins School of Medicine, Baltimore, MD 21231;
		miR-32	PFV-1	PFV-1	inhibitory	cell experiment	A Cellular MicroRNA Mediates Antiviral Defense in Human Cells	Charles-Henri Lecellier, 2005	CNRS Unité Propre de Recherche (UPR) 2357, Institut de Biologie Moléculaire des Plantes, 12 rue du Général Zimmer, 67084 Strasbourg Cedex, France
		miR-965	wsv240	WSSV	inhibitory	animal experiment	The role of shrimp miR-965 in virus infection	Le Shu & Changrun Li, Xiaobo Zhang, 2016	College of Life Sciences, Zhejiang University, Hangzhou 310058, People's Republic of China
		miR-7	wsv477	WSSV	inhibitory	animal experiment	Functional analysis of a crustacean microRNA in host-virus interactions	Tianzhi Huang & Xiaobo Zhang, 2012	Key Laboratory of Conservation Biology for Endangered Wildlife of Ministry of Education, Key Laboratory of Animal Virology of Ministry of Agriculture and College of Life Sciences, Zhejiang University, Hangzhou, China
		WSSV-miR-66	wsv094, wsv177	WSSV	promoting	animal experiment	Viral MicroRNAs Targeting Virus Genes Promote Virus Infection in Shrimp In Vivo	Yaodong He & Xiaobo Zhang, 2014	Key Laboratory of Animal Virology of Ministry of Agriculture and College of Life Sciences, Zhejiang University, Hangzhou, People’s Republic of China
		WSSV-miR-68	wsv248, wsv309	WSSV	promoting	animal experiment	Viral MicroRNAs Targeting Virus Genes Promote Virus Infection in Shrimp In Vivo	Yaodong He & Xiaobo Zhang, 2015	Key Laboratory of Animal Virology of Ministry of Agriculture and College of Life Sciences, Zhejiang University, Hangzhou, People’s Republic of China
		miR-142	CV A21	CV A21	inhibitory	animal and cell experiments	MicroRNA Antagonism of the Picornaviral Life Cycle: Alternative Mechanisms of Interference	Elizabeth J. Kelly & Stephen J. Russell, 2010	Department of Molecular Medicine, Mayo Clinic College of Medicine, Rochester, Minnesota, United States of America,
		miR-142-3p	EEEV	EEEV	inhibitory	animal and cell experiments	RNA viruses can hijack vertebrate microRNAs to suppress innate immunity	Derek W. Trobaugh & William B. Klimstra , 2014	Center for Vaccine Research and Department of Microbiology and Molecular Genetics, University of Pittsburgh, Pittsburgh, Pennsylvania 15261, USA.
		miR-375	M	NDV	inhibitory	cell experiment	MiR-375 Has Contrasting Effects on Newcastle Disease Virus Growth Depending on the Target Gene	Xinglong Wang & Zengqi Yang, 2019	College of Veterinary Medicine, Northwest A & F University, Yangling, Shaanxi Province 712100, PR China
5'UTR	up-regulating the translation of target mRNA	miR-281	DENV-2	DENV	promoting	animal and cell experiments	miR-281, an abundant midgut-specific miRNA of the vector mosquito Aedes albopictus enhances dengue virus replication	Yanhe Zhou & Xiaoguang Chen, 2014	Key Laboratory of Prevention and Control for Emerging Infectious Diseases of Guangdong, Department of Pathogen Biology, School of Public Health and Tropical Medicine, Southern Medical University, Guangzhou, China
		miR-10a	vp26, vp28, wssv102	WSSV	promoting	animal experiment	Shrimp miR-10a Is Co-opted by White Spot Syndrome Virus to Increase Viral Gene Expression and Viral Replication	Jiun-Yan Huang & Chia-Ying Chu , Chu-Fang Lo, 2017	Department of Biotechnology and Bioindustry Sciences, College of Bioscience and Biotechnology, National Cheng Kung University, Tainan, Taiwan,
		miR-122	HCV RNA	HCV	promoting	cell experiment	Positive and negative modulation of viral and cellular mRNAs by liver-specific microRNA miR-122	C.L. JOPLING, 2006	Department of Microbiology and Immunology, Stanford University School of Medicine, Stanford, California 94305
		miR-122	HCV RNA	HCV	promoting	cell experiment	Cooperative enhancement of translation by two adjacent microRNA-122/Argonaute 2 complexes binding to the 5' untranslated region of hepatitis C virus RNA.	Anika Nieder-Röhrmann & Michael Niepmann, 2016	Institute of Biochemistry, Faculty of Medicine, Justus-Liebig-University, 35392 Giessen, Germany.
	Down-regulating the translation of target mRNA	miR-130b	PRRSV	PRRSV	inhibitory	animal and cell experiments	Cellular miR-130b inhibits replication of porcine reproductive and respiratory syndrome virus in vitro and in vivo	Liwei Li & Guangzhi Tong, 2015	Shanghai Veterinary Research Institute, Chinese Academy of Agricultural Sciences, Shanghai 200241, P .R. China.
		miR-548G-3p	DENV	DENV	inhibitory	cell experiment	Cellular microRNA-miR-548g-3p modulates the replication of dengue virus	Weitao Wen & Xun Zhu , Mengfeng Li, 2014	Key Laboratory of Tropical Disease Control (Sun Yat-sen University), Ministry of Education, Guangzhou 510080, China
		miR-199a*	HCV	HCV	inhibitory	cell experiment	Regulation of the hepatitis C virus genome replication by miR-199a	Yoshiki Murakami & Yoshiki Murakami, 2009	Center for Genomic Medicine, Kyoto University, Shogoin-Kawaharacho, Sakyo-ku, Kyoto 606-8507, Japan
ORF	up-regulating the translation of target mRNA	miR-10a*	CVB3 3D	CVB3	promoting	animal and cell experiments	MiR-10a* up-regulates coxsackievirus B3 biosynthesis by targeting the 3D-coding sequence	Lei Tong & Wenran Zhao, Zhaohua Zhong, 2013	Department of Microbiology, Harbin Medical University, 157 Baojian Road, Harbin 150081, China,
	Down-regulating the translation of target mRNA	miR-323, miR491, miR654	PB1	H1N1	inhibitory	cell experiment	Cellular microRNAs inhibit replication of the H1N1 influenza A virus in infected cells.	Liping Song & Wenlin Huang, 2010	CAS Key Laboratory of Pathogen and Immunology, Institute of Microbiology, Chinese Academy of Sciences, Chaoyang District, Beijing 100101, China,
		miR-let-7b	PB1	H1N1	inhibitory	cell experiment	Altered viral replication and cell responses by inserting microRNA recognition element into PB1 in pandemic influenza A virus (H1N1) 2009	Xiaoyue Shen, & Yi Shi, Zheng Xing, Xin Su1, 2015	Department of Respiratory Medicine, Jinling Hospital, Nanjing University School of Medicine, Nanjing, Jiangsu 210002, China
		miR-584-5p, miR-1249	PB2	H5N1, H1N1	inhibitory	cell experiment	The highly pathogenic H5N1 influenza A virus down-regulated several cellular MicroRNAs which target viral genome	Rong Wang & Xiao-Wei Zhou, Pei-Tang Huang, 2017	Laboratory of Protein Engineering, Beijing Institute of Biotechnology, Beijing, China
		miR-188-3p	PB2	H1N1, H5N6, H7N	inhibitory	cell experiment	Identification of cellular microRNA miR-188-3p with broad-spectrum anti-influenza A virus activity	Huan Cui & Juxiang Liu, Yuwei Gao, Zhendong Guo, 2020	Institute of Military Veterinary, Academy of Military Medical Sciences, 666 West Liuying Road, Changchun 130122, Jilin, China
		miR-296-5p	VP1, VP3	EV71	inhibitory	cell experiment	Human MicroRNA hsa-miR-296-5p Suppresses Enterovirus 71 Replication by Targeting the Viral Genome	Zhenhua Zheng & Hanzhong Wang, 2013	State Key Laboratory of Virology, Wuhan Institute of Virology, Chinese Academy of Sciences, Wuhan, China
		miR-199a-3p	S	HBV	inhibitory	cell experiment	Suppression of hepatitis B virus replication by microRNA-199a-3p and microRNA-210	Guang-ling Zhang & Hua Tang , 2010	Tianjin Life Science Research Center and Basic Medical School, Tianjin Medical University, Tianjin 300070, China
		hsa-miR-125a-5p	Region from 3037 to 3065	HBV	inhibitory	cell experiment	Human microRNA hsa-miR-125a-5p interferes with expression of hepatitis B virus surface antigen	Nicoletta Potenza & Aniello Russo*, 2011	Department of Life Sciences, Second University of Naples, Via Vivaldi 43, 81100 Caserta, Italy
		miR-342-5P	CVB3 2C	CVB3	inhibitory	cell experiment	MiR-342-5p suppresses coxsackievirus B3 biosynthesis by targeting the 2C-coding region	Linlin Wang & Wenran Zhao , Zhaohua Zhong , 2012	Department of Microbiology, Harbin Medical University, Harbin 150081, China
		miR-28-3p	Gag/pol	HTLV-1	inhibitory	cell experiment	miR-28-3p Is a Cellular Restriction Factor That Inhibits Human T Cell Leukemia Virus, Type 1 (HTLV-1) Replication and Virus Infection*	Xue Tao Bai & Christophe Nicot, 2015	University of Kansas Medical Center, Department of Pathology and Laboratory Medicine and Center for Viral Oncology, Kansas City, Kansas 66160
		gga-miR-130b	ORF A	IBDV	inhibitory	cell experiment	MicroRNA gga-miR-130b Suppresses Infectious Bursal Disease Virus Replication via Targeting of the Viral Genome and Cellular Suppressors of Cytokine Signaling 5	Mengjiao Fu & Shijun J. Zheng, 2018	State Key Laboratory of Agrobiotechnology, Beijing, China
		gga-miR-454	ORF B	IBDV	inhibitory	cell experiment	gga-miR-454 suppresses infectious bursal disease virus (IBDV) replication via directly targeting IBDV genomic segment B and cellular Suppressors of Cytokine Signaling 6 (SOCS6)	Mengjiao Fu & Shijun J. Zheng, 2018	State Key Laboratory of Agrobiotechnology, China Agricultural University, Beijing 100193, China
		gga-miR-21	VP1	IBDV	inhibitory	cell experiment	Overexpression of microRNA gga-miR-21 in chicken fibroblasts suppresses replication of infectious bursal disease virus through inhibiting VP1 translation	Yong-shan Wang & Yong-shan Wang , Xiao-mei WangX, 2013	Key Laboratory of Veterinary Biological Engineering and Technology, Ministry of Agriculture, Institute of Veterinary Medicine, Jiangsu Academy of Agricultural Sciences, Nanjing 210014, China
		miR-181	ORF4	PRRSV	inhibitory	animal and cell experiments	Increasing Expression of MicroRNA 181 Inhibits Porcine Reproductive and Respiratory Syndrome Virus Replication and Has Implications for Controlling Virus Infection	Xue-kun Guo & Wen-hai Feng, 2013	State Key Laboratories of Agrobiotechnology, a Department of Microbiology and Immunology, b Department of Molecular Biology, c College of Biological Science, China Agricultural University, Beijing, China
		miR-23	ORF 3	PRRSV	inhibitory	cell experiment	MicroRNA-23 inhibits PRRSV replication by directly targeting PRRSV RNA and possibly by upregulating type I interferons	Qiong Zhang & Wen-hai Feng, 2014	State Key Laboratory of Agrobiotechnology, College of Biological Sciences, China Agricultural University, Beijing 100193, China
		miR-505	ORF 3, ORF 5	PRRSV	inhibitory	cell experiment	MicroRNA-23 inhibits PRRSV replication by directly targeting PRRSV RNA and possibly by upregulating type I interferons	Qiong Zhang & Wen-hai Feng, 2014	State Key Laboratory of Agrobiotechnology, College of Biological Sciences, China Agricultural University, Beijing 100193, China
		miR-378	ORF 7	PRRSV	inhibitory	cell experiment	MicroRNA-23 inhibits PRRSV replication by directly targeting PRRSV RNA and possibly by upregulating type I interferons	Qiong Zhang & Wen-hai Feng, 2014	State Key Laboratory of Agrobiotechnology, College of Biological Sciences, China Agricultural University, Beijing 100193, China
		has-miR-139-3p	E1	HPV	inhibitory	cell experiment	Role of Host miRNA Hsa-miR-139-3p in HPV-16-Induced Carcinomas	M.K. Sannigrahi & Madhu Khullar, 2017	Department of Otolaryngology, Post Graduate Institute of Medical Education and Research (PGIMER), Chandigarh, India.
		AmiRNAs	NS5, NS2A	WNV	inhibitory	cell experiment	Vector derived artificial miRNA mediated inhibition of West Nile virus replication and prote	Divyanshi Karothia1 & Jyoti S.Kumar, 2019	Division of Virology, Defence Research and Development Establishment, Jhansi Road, Gwalior-474002
		miR-769-3p	NP	H1N1	inhibitory	cell experiment	miR-769-3p对甲型H1N1流感病毒核蛋白表达的调控	GUO Zhen-Dong & WANG Li, WANG Yu-Min, 2013	Beijing Institute of Biotechnology, Beijing 100071;
		SSC-miR-204	HA1	SIV-H1N1/2009	inhibitory	cell experiment	Sus scrofa miR-204 and miR-4331 Negatively Regulate Swine H1N1/2009 Influenza A Virus Replication by Targeting Viral HA and NS	Shishuo Zhang & Hongbo Zhou, 2017	State Key Laboratory of Agricultural Microbiology , College of V eterinary Medicine, Huazhong Agricultural University , Wuhan 430070, China;
		SSC-miR-4331	NS1	SIV-H1N1/2009	inhibitory	cell experiment	Sus scrofa miR-204 and miR-4331 Negatively Regulate Swine H1N1/2009 Influenza A Virus Replication by Targeting Viral HA and NS	Shishuo Zhang & Hongbo Zhou, 2017	State Key Laboratory of Agricultural Microbiology , College of V eterinary Medicine, Huazhong Agricultural University , Wuhan 430070, China;
		miR-24	L	VSV	inhibitory	animal and cell experiments	Hypersusceptibility to vesicular stomatitis virus infection in Dicer1-deficient mice is due to impaired miR24 and miR93 expression	Motoyuki Otsuka & Jiahuai Han, 2007	Department of Immunology, The Scripps Research Institute, La Jolla, CA 92037, USA
		miR-93	P	VSV	inhibitory	animal and cell experiments	Hypersusceptibility to vesicular stomatitis virus infection in Dicer1-deficient mice is due to impaired miR24 and miR93 expression	Motoyuki Otsuka & Jiahuai Han, 2007	Department of Immunology, The Scripps Research Institute, La Jolla, CA 92037, USA
		miR-485（3'UTR	PB1	H5N1	inhibitory	cell experiment	The microRNA miR-485 targets host and influenza virus transcripts to regulate antiviral immunity and restrict viral replication	Harshad Ingle & Himanshu Kumar, 2015	Laboratory of Immunology, Department of Biological Sciences, Indian Institute of Science Education and Research, Bhopal 462066, India.
		miR-2911	PB2, NS1	H1N1, H5N1, H7N9	inhibitory	animal and cell experiments	Honeysuckle-encoded atypical microRNA2911 directly targets influenza A viruses	Zhen Zhou & Hualan Chen,Ke Zen,Chen-Yu Zhang，Junfeng Zhang, Hua Wang, 2015	Jiangsu Engineering Research Center for MicroRNA Biology and Biotechnology, State Key Laboratory of Pharmaceutical Biotechnology, School of Life Sciences, Nanjing University, Nanjing, Jiangsu 210093, China;
		miRNA-7	NSP5	RV	inhibitory	animal and cell experiments	MicroRNA-7 Inhibits Rotavirus Replication by T argeting Viral NSP5 In Vivo and In Vitro	Yan Zhou & Hongjun Li, 2020	Institute of Medical Biology , Chinese Academy of Medical Science & Peking Union Medical College, Yunnan Key Laboratory of Vaccine Research and Development on severe Infectious Disease, Kunming 650118, China
		has-miR-29a	nef	HIV	inhibitory	cell experiment	Human cellular microRNA hsa-miR-29a interferes with viral nef protein expression and HIV-1 replication	Jasmine K Ahluwalia & Samir K Brahmachari, 2008	Institute of Genomics and Integrative Biology (IGIB) CSIR, Mall Road, Delhi-110007, India
5’ end of all transcripts	Down-regulating the translation of target mRNA	miR-TAR-3p	Trans-activation responsive (TAR) element of all transcript	HIV	inhibitory	cell experiment	Expression of HIV-encoded microRNA-TAR and its inhibitory effect on viral replication in human primary macrophages	Li L & Wei Hou, Yong Feng, 2016	School of Basic Medical Sciences, Wuhan University, 185 Donghu Road, Wuchang, Wuhan 430070, Hubei, People’s Republic of China
